1  
2  
3  
4  
5  
6  
7  
8  
9  
10  
11  
12  
13  
14  
15  
16  
17  
18  
19  
20  
21  
22

**Serial passaging causes extensive positive selection in seasonal influenza A  
hemagglutinin**

Claire D. McWhite<sup>1,2</sup>, Austin G. Meyer<sup>1,3,4</sup>, Claus O. Wilke<sup>1,3,4</sup>

<sup>1</sup>Center for Systems and Synthetic Biology and Institute for Cellular and Molecular  
Biology, The University of Texas at Austin, Austin, TX 78712

<sup>2</sup>Department of Molecular Biosciences, The University of Texas at Austin, Austin, TX  
78712

<sup>3</sup>Center for Computational Biology and Bioinformatics, The University of Texas at  
Austin, Austin, TX 78712

<sup>4</sup>Department of Integrative Biology, The University of Texas at Austin, Austin, TX 78712

Address correspondence to [wilke@austin.utexas.edu](mailto:wilke@austin.utexas.edu)

23 Clinical influenza A isolates are rarely sequenced directly. Instead, a majority of these  
24 isolates (~70% in 2015) are first subjected to serial passaging for amplification, most  
25 commonly in non-human cell culture. Here, we find that this passaging leaves distinct  
26 signals of adaptation in the viral sequences, and it confounds evolutionary analyses of  
27 the viral sequences. We find distinct patterns of adaptation to generic (MDCK) and  
28 monkey cell culture. These patterns also dominate pooled data sets not separated by  
29 passaging type. By contrast, MDCK-SIAT1 passaged sequences seem mostly (but not  
30 entirely) free of passaging adaptations. Contrary to previous studies, we find that using  
31 only internal branches of the influenza phylogenetic trees is insufficient to correct for  
32 passaging artifacts. These artifacts can only be safely avoided by excluding passaged  
33 sequences entirely from subsequent analysis. We conclude that all future influenza  
34 evolutionary analyses must appropriately control for potentially confounding effects of  
35 passaging adaptations.

36

37

38

39

40

41

42

43

## 44 INTRODUCTION

45 The routine sequencing of clinical isolates has become a critical component of global  
46 seasonal influenza surveillance (World Health Organization Global influenza  
47 surveillance network, 2011). Analysis of these viral sequences informs the selection of  
48 future vaccine strains (Stöhr et al., 2012; WHO Writing Group et al., 2012), and a wide  
49 variety of computational methods have been developed to identify sites under selection  
50 or immune-escape mutations (Blackburne et al., 2008; Koelle et al., 2006; Nelson et al.,  
51 2006; Suzuki, 2008; Wolf et al., 2006), or to predict the short-term evolutionary future of  
52 influenza virus (Łuksza and Lässig, 2014; Neher et al., 2014). However, sites that  
53 appear positively selected in sequence analysis frequently do not agree with sites  
54 identified experimentally in hemagglutination inhibition assays (Meyer and Wilke, 2015;  
55 Tusche et al., 2012), and the origin of this discrepancy is unclear. Here, we argue that a  
56 major cause of this discrepancy is widespread serial passaging of influenza virus before  
57 sequencing.

58  
59 Clinical isolates are generally passaged in culture to amplify viral copy number, as well  
60 as to introduce virus into a living system for testing strain features such as vaccine  
61 response, antiviral response, and replication efficiency (Kumar and Henrickson, 2012;  
62 World Health Organization Global influenza surveillance network, 2011). A variety of  
63 culture systems are used for virus amplification. Cell cultures derived from Madin-Darby  
64 canine kidney (MDCK) cells are by far the most widely used system, with the majority of  
65 sequences in influenza repositories deriving from virus that has been passaged through  
66 an MDCK cell culture (Balish et al., 2005; Bogner et al., 2006). Influenza virus may also

67 be passaged through monkey kidney (RhMK or TMK) cell culture or injected directly into  
68 egg amniotes. Alternatively, complete influenza genomes can be obtained from PCR-  
69 amplified influenza samples without intermediate passaging (Katz et al., 1990; Lee et  
70 al., 2013a).

71  
72 Several experiments have demonstrated that influenza hemagglutinin (HA) accumulates  
73 mutations following rounds of serial passaging in both cell (Ilyushina et al., 2012; Lee et  
74 al., 2013b; Wyde et al., 1977) and egg culture (Robertson et al., 1993). The decreased  
75 number of mutations in MDCK-based cell culture is the main argument for use of this  
76 system over egg amniotes in vaccine production (Katz and Webster, 1989), with MDCK  
77 cells expressing human SIAT1 having the highest fidelity to the original sequence and  
78 reduced host adaptation (Hamamoto et al., 2013). Viral adaptations to eggs have  
79 recently been linked to reduced vaccine efficacy (Skowronski et al., 2014; Xie et al.,  
80 2015) and were implicated as potentially contributing to reduced efficacy of 2014-2015  
81 seasonal H3N2 influenza vaccination in the World Health Organization's  
82 recommendations for 2015-2016 vaccine strains (The World Health Organization,  
83 2015). As the majority of influenza vaccines worldwide are produced in eggs, vaccine  
84 strain selection is limited to virus with the ability to replicate rapidly in this system (World  
85 Health Organization Global influenza surveillance network, 2011).

86  
87 Although egg-passaged sequences are increasingly excluded from influenza  
88 phylogenetic analysis (see e.g. the NextFlu tracker (Neher and Bedford, 2015)), due to  
89 the known high host-specific substitution rates, cell culture is generally not thought to be

90 sufficiently selective to produce a discernable evolutionary signal. One of few existing  
91 evolutionary analyses of passaging effects on influenza (Bush et al., 2000)  
92 demonstrated that passaging causes no major changes in clade structure between egg  
93 and cell passaged viruses. Moreover, several studies have recommended the use of  
94 internal branches in the phylogenetic tree to reduce passaging effects in evolutionary  
95 analysis of Influenza A (Bush et al., 2001; Suzuki, 2006). Another study discovered egg  
96 culture to be the cause of misidentification of several sites under positive selection in  
97 Influenza B (Gatherer, 2010), but this study was limited to comparing egg-cultured to  
98 cell-cultured virus. As the availability of unpassaged influenza sequences has  
99 dramatically increased over the past ten years, we can now perform a direct comparison  
100 of passaged to circulating virus.

101  
102 Here, we compare patterns of adaptation in North American seasonal H3N2 influenza  
103 HA sequences derived from passaged and unpassaged virus. We divide viral  
104 sequences by their passaging history, distinguishing between unpassaged clinical  
105 samples, egg amniotes, RhMK (monkey) cell culture, and generic/MDCK-based cell  
106 culture. For the latter, we also distinguish between virus passaged in MDCK-SIAT1 cell  
107 culture (SIAT1) and in unmodified MDCK or unspecified cell culture (non-SIAT1). We  
108 find clear signals of adaptation to the various passaging conditions. These signals are  
109 strongly present in the tip branches of the phylogenetic trees but can also be detected in  
110 internal branches. Finally, we demonstrate that the identification of antigenic escape  
111 sites from sequence data has been confounded by passaging adaptations, and that the

112 exclusion of passaged sequences allows us to use sequence and structural data to  
113 highlight regions involved in antigenic escape.

114

## 115 **RESULTS**

116 Most influenza-virus samples collected from patients are first serially passaged through  
117 one or more culturing systems, prior to PCR amplification and sequencing (Figure 1A).  
118 Reconstructed trees of influenza evolution contain a mixture of passage histories at  
119 their tips (Figure 1B). During serial passaging, influenza genomes accumulate adaptive  
120 mutations, and the effect of these mutations on evolutionary analyses of influenza  
121 sequences is not well understood.

122

### 123 **Sitewise evolutionary rate patterns differ between passage groups**

124 To quantify any evolutionary signal that may be introduced by passaging, we  
125 assembled, from the GISAID database (Bogner et al., 2006), a set of North American  
126 human influenza H3N2 hemagglutinin sequences collected between 2005 and 2015.  
127 We initially sorted these sequences into groups by their passage history: (1)  
128 unpassaged, (2) egg-passaged, (3) generic cell-passaged, and (4) monkey cell-  
129 passaged (Table 1). To assess evolutionary variation at individual sites, we calculated  
130 site-specific  $dN/dS$  (Echave et al., 2016), using Single Likelihood Ancestor Counting  
131 (SLAC). Specifically, we calculated one-rate  $dN/dS$  estimates, i.e., site-specific  $dN$   
132 values normalized by a global  $dS$  value (see Methods for details). In addition to  
133 considering groups of sequences with specific passage histories, we also calculated  
134  $dN/dS$  values by pooling all sequences into one combined analysis. This pooled group

135 corresponds to a typical influenza evolutionary analysis in which passage history has  
136 not been accounted for.

137

138 We first correlated the sitewise  $dN/dS$  values we obtained for virus sequences derived  
139 from different passage histories. If passage history did not matter, then the  $dN/dS$   
140 values obtained from different sources should correlate strongly with each other, with  $r$   
141 approaching 1. Instead, we found that correlation coefficients ranged from 0.68 to 0.88,  
142 depending on which specific comparison we made (Figure 2A). (In this analysis, and  
143 throughout this work, we down-sampled alignments to the smallest number of  
144 sequences available for any of the conditions compared, to keep the samples as  
145 comparable as possible overall. The analysis of Figure 2 used  $n = 917$  randomly drawn  
146 sequences for each condition.) Unpassaged  $dN/dS$  correlated more strongly with cell  
147 and pooled  $dN/dS$  (correlations of 0.77 and 0.79, respectively) than with monkey-cell  
148  $dN/dS$  (0.68). Note that the  $dN/dS$  values from the pooled group, which corresponds to  
149 a typical data set used in a phylogenetic analysis of influenza, more closely correlated  
150 with the  $dN/dS$  values from the generic cell group ( $r = 0.87$ ) than from the unpassaged  
151 group ( $r = 0.79$ ). Egg-derived sequences were excluded from this analysis due to low  
152 sequence numbers ( $n = 79$ ), however evolutionary rates from this condition correlated  
153 particularly poorly with those of random draws of 79 unpassaged sequences  
154 (Supplementary Figure 1). This result is consistent with the conclusions of (Bush et al.,  
155 2000), (Suzuki, 2006), and (Gatherer, 2010) that egg-derived sequences show specific  
156 adaptations not found otherwise in influenza sequences.

157

158 Because the common ancestor of any two passaged influenza viruses is a virus that  
159 replicated in humans, we would expect that any adaptations introduced during  
160 passaging should not extend into the internal branches of a reconstructed tree.  
161 Therefore, we additionally subdivided phylogenetic trees into internal branches and tip  
162 branches, and calculated site-specific  $dN/dS$  values separately for these two sets of  
163 branches. In fact, (Bush et al., 2000) had recommended the use of internal branches to  
164 reduce variation seen between egg and non-egg passaged virus. As expected, we  
165 found that when  $dN/dS$  calculations were restricted to the internal branches, the  
166 correlations between the passage groups overall increased (Figure 2B), even though  
167 distinct differences between the passage groups remained. Conversely, when only  
168 considering tip branches, correlations among most groups were relatively low (Figure  
169 2C), with the exception of cell-passaged sequences compared to the pooled  
170 sequences. This finding emphasizes once again that the pooled sample is most similar  
171 to the cell-passaged sample. We conclude that different passaging histories leave  
172 distinct, evolutionary signatures of adaptation to the passaging environment.

173  
174 To further investigate the apparent discrepancies between  $dN/dS$  derived from  
175 unpassaged sequences, monkey-cell passaged sequences, cell-passaged sequences,  
176 and the pooled set, we compared the magnitude of the site-wise rates (Figure 2D). Cell-  
177 passaged and pooled sequences had, on average, significantly inflated  $dN/dS$  values  
178 compared to unpassaged and monkey-cell-passaged sequences in the full phylogenetic  
179 tree (paired  $t$  test,  $P = 1.5 \times 10^{-05}$  and  $P = 9.1 \times 10^{-05}$ , respectively) and along tip  
180 branches (paired  $t$  test,  $P = 1.8 \times 10^{-06}$  and  $P = 6.3 \times 10^{-05}$ , respectively). By contrast,



181 there were no significant differences between cell-passaged and pooled sequences in  
182 all three cases (paired  $t$  test,  $P = 0.26$ ,  $P = 0.24$ , and  $P = 0.26$ , respectively, for the full  
183 tree, internal branches, and tip branches).  $dN/dS$  values were generally more similar  
184 along internal branches, however a significant difference of  $dN/dS$  from cell-passaged  
185 and pooled sequences relative to monkey-cell-passaged sequences remained. These  
186 results demonstrate that both cell-passaged and pooled sequences show artificially  
187 inflated  $dN/dS$  values compared to unpassaged sequences.

188

189 In aggregate, these results show that while both generic-cell-passaged sequences and  
190 monkey-cell-passaged sequences yield different sitewise  $dN/dS$  patterns relative to  
191 unpassaged sequences (Fig. 2A-C), cell passaging additionally creates inflated  $dN/dS$   
192 values (Fig. 2D), indicating positive adaptation to the passaging condition. At the same  
193 time,  $dN/dS$  values derived from monkey-cell-passaged sequences are the least similar  
194 to  $dN/dS$  from unpassaged sequences (Fig. 2A–C). The pooled group of sequences,  
195 which corresponds to a typical data set used in evolutionary analyses of influenza virus,  
196 describes evolutionary rates of specifically cell passaged virus and poorly matches  
197 evolutionary rates of circulating influenza virus.

198

### 199 **Adaptations to cell and monkey-cell passage display characteristic patterns of** 200 **site variation**

201 We next asked whether adaptations to passage history were located in specific regions  
202 of the HA protein. To address this question, we employed the geometric model of HA  
203 evolution we recently introduced (Meyer and Wilke, 2015). For H3N2 HA, this model

204 explains over 30% of the variation in  $dN/dS$  using two simple physical measures, the  
205 relative solvent accessibility (RSA) of individual residues in the structure (Tien et al.,  
206 2013) and the inverse linear distance in 3D space from each residue to protein site 224  
207 in the hemagglutinin monomer. Notably, the geometric model was previously applied to  
208 a pooled sequence set including sequences of various passaging histories. To what  
209 extent it carries over to sequences with specific passaging histories is not known.

210  
211 We first considered the correlation between  $dN/dS$  and RSA (Figure 3A). We found that  
212 for all passage groups,  $R^2$  values ranged from 0.10 to 0.16 in the full tree, consistent  
213 with our earlier work (Meyer and Wilke, 2015). The high congruence among  $R^2$  values  
214 for internal branches and all branches suggests that RSA imposes a pervasive selection  
215 pressure on HA, independent of passaging adaptations. Thus, RSA represents a useful  
216 structural measure of a persistent effect of  $dN/dS$  with stronger correlations in the full  
217 tree and internal branches than in tip branches.

218  
219 Next we considered the correlation between  $dN/dS$  and the inverse distance to site 224  
220 (Figure 3B). In contrast to RSA, correlations here were systematically higher in tip  
221 branches, suggesting a recent adaptive signal. We found virtually no correlation for  
222 unpassaged sequences, while a low correlation existed for monkey-cell cultured  
223 sequences and a higher correlation for cell-passaged and pooled sequences.  
224 Correlations from pooled sequences mirrored cell culture correlations and persisted  
225 through internal branches. Thus, the correlation of  $dN/dS$  with the inverse distance to  
226 site 224 seems to be primarily an artifact of cell passage, even though its effect can be

227 seen along internal branches as well. As the majority of the available HA sequences are  
228 cell-derived, this cell-specific signal dominates the pooled data set. Further, this cell-  
229 specific signal is partially attenuated along internal branches and amplified along tip  
230 branches, as we would expect from a signal caused by recent host-specific adaptation.  
231 Even though this signal is a true predictor of influenza evolutionary rates for virus grown  
232 in cell culture, it does not transfer to unpassaged sequences and therefore has no  
233 relevance for the circulating virus. This finding serves as a strong demonstration of  
234 passage history as a confounder in evolutionary analysis of hemagglutinin evolution, not  
235 just for egg passage as previously demonstrated, but also for cell and monkey-cell  
236 passage.

237

238 Surprisingly, the correlation we found here between  $dN/dS$  and inverse distance to site  
239 224 for pooled sequences ( $R^2 = 0.067$ ) was less than half of the value reported by  
240 (Meyer and Wilke, 2015) (Fig. 3B). However, using a dataset of sequences more  
241 temporally matched to that paper's dataset (2005–2014 instead of 2005–2015), we  
242 recovered the previously seen higher correlation. This finding suggests that there is  
243 some feature in the additional 2015 sequences that changes the pooled dataset's  
244 relationship with inverse distance to site 224. In 2015, unpassaged and SIAT1  
245 sequenced each doubled in number compared to in 2014, while the number of non-  
246 SIAT1 cell cultured sequences dropped dramatically (Table 2). Therefore, we next  
247 investigated whether the drop in correlation from 2014 to 2015 could be attributed to the  
248 recent reduction in cell culture using non-SIAT1 cells.

249

250 **There is little signal of adaptation to passage in SIAT1 cells**

251 In the preceding analyses, we lumped all cell cultures except monkey cells into the  
252 same category. However, there are more subtle distinctions in cell passaging systems,  
253 and they can exert differential selective pressures on human adapted virus (Hamamoto  
254 et al., 2013; Oh et al., 2008). As our generic cell culture group was composed of a  
255 mixture of wild type MDCK, SIAT1, and unspecified cell cultures, we next investigated  
256 whether any one culture type was the source of the high cell-culture signal in Figure 3B.

257  
258 The SIAT1 cell system, which overexpresses human-like 6-linked sialic acids over  
259 native 3-linked sialic acids (Matrosovich et al., 2003), is currently the dominant system  
260 for serial passaging of influenza virus. Approximately half of the 2015 influenza  
261 sequences currently available from GISAID derive from serial passaging through SIAT1  
262 cells. Experimental analysis of SIAT1 demonstrates improved sequence fidelity and  
263 reduced positive selection over unmodified MDCK cell culture (Hamamoto et al., 2013;  
264 Oh et al., 2008). We sought to determine if the apparently cell-culture-specific  
265 correlation of site-wise evolutionary rates and inverse distance to site 224 extended to  
266 SIAT1 cell culture. To compare cell-culture varieties, we created sample-size matched  
267 groups of non-SIAT1 cell culture, SIAT1 cell culture, and unpassaged sequences  
268 collected between 2005 and 2015 ( $n = 1046$ ), excluding sequences that had been  
269 passaged through both a non-SIAT1 and a SIAT1 cell culture.

270  
271 All groups showed similar correlations between  $dN/dS$  and RSA, regardless of whether  
272  $dN/dS$  was calculated for the entire tree, for internal branches only, or for tip branches

273 only (Figure 4A). By contrast, inverse distance to site 224 uniquely correlated with  
274  $dN/dS$  from non-SIAT1-cultured virus (Figure 4B). This effect was the strongest along  
275 tip branches ( $R^2 = 0.139$ ), but it was almost as strong along the entire tree ( $R^2 = 0.129$ ).  
276 The correlation was reduced, though still significant, among internal branches ( $R^2 =$   
277  $0.075$ ). Thus, we conclude that the correlation between  $dN/dS$  and the inverse distance  
278 to site 224 (Meyer and Wilke, 2015) represents a unique signal of adaptation to  
279 passaging in non-SIAT1 cells. In our previous analysis (Meyer and Wilke, 2015), a non-  
280 SIAT1-specific signal completely dominated our evolutionary rate models, due to use of  
281 a standard, pooled data set mainly composed of sequences passaged in non-SIAT1  
282 cells. In our new analysis (Figure 3B), the high correlation of non-SIAT1 cell  $dN/dS$  with  
283 inverse distance to site 224 is suppressed in the pooled condition, because the number  
284 of unpassaged and SIAT1-passaged sequences grew substantially in 2015. This  
285 difference in sample composition explains the lower than expected correlations in  
286 Figure 3B for pooled  $dN/dS$ .

287  
288 When considering all branches in the phylogenetic tree, we found that  $dN/dS$  values  
289 were significantly inflated in sequences passaged in non-SIAT1 cells compared to both  
290 unpassaged and SIAT1-passaged sequences (paired  $t$  test,  $P = 5.05 \times 10^6$  and  $P = 6.94$   
291  $\times 10^8$ , respectively, Figure 4C), whereas unpassaged and SIAT1-passaged sequences  
292 showed no significant increase (Figure 4C). Unpassaged and non-SIAT1-passaged  
293 sequences showed significant differences along internal branches (paired  $t$  test,  $P =$   
294  $0.036$ ) and tip branches as well (paired  $t$  test,  $P = 2.03 \times 10^6$ , Figure 4C). Thus, virus

295 amplified in non-SIAT1 cell culture measurably adapts to this non-human host, and  
296 these adaptations can significantly confound downstream evolutionary analyses.

297  
298 As these three conditions are somewhat temporally separated (most non-SIAT1 cell  
299 culture sequences are pre-2015, and most unpassaged and SIAT1 culture sequences  
300 are post-2014), we controlled for season-to-season variation by drawing 249 sequences  
301 from each group from 2014. First, we again considered site-wise  $dN/dS$  correlations  
302 among passaging groups, and we found that overall, unpassaged and SIAT1-passaged  
303 sequences appeared the most similar (Supplementary Figure 2A–C). However, both  
304 SIAT1 and non-SIAT1 showed  $dN/dS$  values that were inflated over  $dN/dS$  in  
305 unpassaged sequences when considering the full tree (paired  $t$  test,  $P = 0.029$  and  $P =$   
306  $0.0005$ , respectively, Supplementary Figure 2D), although only non-SIAT1  $dN/dS$  was  
307 significantly inflated in tip branches (paired  $t$  test,  $P = 0.0008$ , Supplementary Figure  
308 2D). (No significant difference was seen along internal branches.) Notably, in this more  
309 controlled comparison of SIAT1 cell culture to unpassaged sequences from the same  
310 year, we observed a significant difference in  $dN/dS$  between these conditions,  
311 suggesting that at least minor passaging artifacts remain after SIAT1 passaging.

312  
313 **Evolutionary variation in sequences from unpassaged virus predicts regions**  
314 **involved in antigenic escape**

315 The preceding results might suggest that the inverse distance metric we previously  
316 proposed (Meyer and Wilke, 2015) only captures effects of adaptation to non-SIAT1 cell  
317 culture. However, this is not necessarily the case. Importantly, inverse distance needs

318 to be calculated relative to a specific reference point. We previously used site 224 as  
319 the reference point because it yielded the highest correlation for the data set we  
320 analyzed then. For a different data set, one that doesn't carry the signal of adaptation to  
321 non-SIAT1 cell culture, a different reference point may be more appropriate.

322  
323 We thus repeated the analysis of (Meyer and Wilke, 2015) for a size matched sample of  
324 1703 sequences from both non-SIAT1 cell passaged and unpassaged virus collected  
325 between 2005 and 2015 (Figure 5). In brief, for each possible reference site in the  
326 hemagglutinin structure, we measured the inverse distance in 3D space from that site to  
327 every other site in the structure. We then correlated the inverse distances with the  
328  $dN/dS$  values at each site, resulting in one correlation coefficient per reference site.  
329 Finally, we mapped these correlation coefficients onto the HA structure, coloring each  
330 reference site by its associated correlation coefficient. If inverse distances measured  
331 from a particular reference amino acid have higher correlation with the sitewise  $dN/dS$   
332 values, then this reference site will appear highlighted on the structure.

333  
334 For non-SIAT1-passaged virus, this analysis recovered the finding of (Meyer and Wilke,  
335 2015) that the loop containing site 224 appeared strongly highlighted (Figure 5A).  
336 However, this signal was entirely absent in unpassaged virus (Figure 5B), with no sites  
337 in that loop working well as a reference point. These results suggest that this loop is  
338 specifically involved in adaptation of hemagglutinin to non-SIAT1 cell culture, explaining  
339 the non-SIAT1-specific signal shown in Figure 4A. Thus, the inverse distance metric is  
340 useful for differentiating regions of selection particular to different experimental groups.

341  
342 (Meyer and Wilke, 2015) had concluded that sites under positive selection differed from  
343 sites involved in immune escape. Here, we have found that the origin of this positive  
344 selection is adaptation to the non-human passaging host, not immune escape in or  
345 adaptation to humans. Therefore, we next asked what residual patterns of positive  
346 selection remained once the adaptation to non-SIAT1 cells was removed. Even though  
347 site-wise correlations are relatively low for unpassaged virus compared to the ones  
348 observed for non-SIAT1-passaged virus, we could still recover relevant patterns of HA  
349 adaptation after rescaling our coloring. In particular, we found that sites opposite to the  
350 loop containing site 224 lit up in our analysis of unpassaged sequences (Figure 6A).  
351 Sites in this region are known to be involved in antigenic escape. In fact, many of the  
352 highlighted regions contain experimentally determined antigenic sites (Koel et al., 2013)  
353 and/or the sites determined to be responsible for the antigenic shift in the 2014/2015  
354 seasonal flu (Chambers et al., 2015) (Table 2). We found a similar pattern of  
355 concordance with antigenic sites when mapping  $dN/dS$  values directly onto the structure  
356 (Figure 6B). The inverse-distance correlations, however, performed better at identifying  
357 antigenic sites than did raw  $dN/dS$  values. When considering the 90<sup>th</sup> percentile (top  
358 10% highest scored sites) by either metric, the inverse-distance correlations recovered  
359 7 of 8 sites while  $dN/dS$  alone recovered only 2 of 8 sites (Table 2).

360

## 361 **DISCUSSION**

362 We have found that serial passaging of influenza virus introduces a measurable signal  
363 of adaptation into the evolutionary analysis of natural influenza sequences. There are



364 unique, characteristic patterns of adaptation to egg passage, monkey cell passage, and  
365 non-SIAT1 cell passage. Monkey cell-derived sequences show different molecule-wide  
366 evolutionary rate patterns, even though they show no  $dN/dS$  inflation when compared  
367 with unpassaged sequences. Non-SIAT1 cell-derived sequences instead display both  
368  $dN/dS$  inflation and a hotspot of positive selection in a loop underneath the sialic-acid  
369 binding region. This hotspot has been previously noted (Meyer and Wilke, 2015) but no  
370 explanation for its origin was available. Further, we have found that virus passaged in  
371 SIAT1 cells seems to accumulate only minor passaging artifacts. Throughout our  
372 analyses, we have found limited utility to subdividing phylogenetic trees into internal and  
373 terminal branches. While signals of passage adaptation are consistently elevated along  
374 terminal branches and attenuated along internal branches, evolutionary rates along  
375 internal branches remain confounded by passaging artifacts. Finally, we could  
376 accurately recover the experimentally determined antigenic regions of hemagglutinin  
377 from evolutionary-rate analysis by using a data set consisting of only unpassaged viral  
378 sequences.

379  
380 Previous studies (Bush et al., 2001; Suzuki, 2006) have suggested the use of internal  
381 branches to alleviate passage adaptations. However, we have found here that this  
382 strategy is insufficient, because the evolutionary signal of passage adaptations can  
383 often be detected along internal branches. This finding seems counterintuitive, as  
384 internal nodes should exclusively represent human-adapted virus. We suggest that  
385 passaging adaptations in internal branches may be caused by convergent evolution; if  
386 different clinical isolates converge onto the same adaptive mutations under passaging,

387 then these mutations may incorrectly be placed along internal branches under  
388 phylogenetic tree reconstruction. Additionally, although the use of only internal branches  
389 removes some differences between the passage groups, the exclusion of terminal  
390 sequences can obscure recent natural adaptations and thus obscure actual sites under  
391 positive selection. Therefore, analysis of internal branches is not only insufficient for  
392 eliminating artifacts from passaging adaptations but also suboptimal for detecting  
393 positive selection in seasonal H3N2 influenza.

394  
395 The safest route to avoid passaging artifacts is to limit sequence data sets to only  
396 unpassaged virus, although this approach limits sequence numbers. The human-like 6-  
397 linked sialic acids in SIAT1 (Matrosovich et al., 2003) greatly reduce observed cell  
398 culture-specific adaptations, particularly in the loop of hemagglutinin which contains site  
399 224. This lack of selection concords with multiple experiments finding low levels of  
400 adaptation in this cell line (Hamamoto et al., 2013; Oh et al., 2008). As our analysis only  
401 detected minor differences between unpassaged and SIAT1 passaged virus, we posit  
402 that this passage condition is an acceptable substitute for unpassaged clinical samples.  
403 Even so, our findings do not preclude the existence of SIAT1-specific adaptations that  
404 may confound specific analyses.

405  
406 Although the majority of the sequences from the year 2015 are SIAT1-passaged or  
407 unpassaged, several hundred sequences from that year derive from monkey cell  
408 culture. The use of monkey cell culture has surged in 2014 and 2015 compared to  
409 previous years. We recommend that these recently collected sequences be excluded

410 from influenza rate analysis, in favor of the majority of unpassaged and SIAT1-  
411 passaged sequences. As passaging is a useful and cost effective method for  
412 amplification of clinically collected virus, unpassaged viral sequences are unlikely to  
413 completely dominate influenza sequence databases in the near future. However, new  
414 human epithelial cell culture systems for influenza passaging, as in (Ilyushina et al.,  
415 2012), could soon provide an ideal system that both amplifies virus and protects it from  
416 non-human selective pressures.

417  
418 Passage history should routinely be considered as a potential confounding variable in  
419 future analyses of influenza evolutionary rates. Future studies should be checked  
420 against unpassaged samples to ensure that conclusions are not based on adaptation to  
421 non-human hosts. We recommend the exclusion of viral sequences which derive from  
422 serial passage in egg amniotes, monkey kidney cell culture, and any unspecified cell  
423 culture. Prior work that did not consider passaging history may likely have been  
424 confounded by passaging adaptations. In particular, we suggest that the evolutionary  
425 markers of influenza virus determined by (Belanov et al., 2015) be reevaluated to  
426 ensure these sites are not artifacts of viral passaging. Similarly, many of the earlier  
427 studies performing site-specific evolutionary analysis of HA, such as (Bush et al., 1999;  
428 Meyer and Wilke, 2015, 2013; Pan and Deem, 2011; Shih et al., 2007; Suzuki, 2008,  
429 2006; Tusche et al., 2012), likely contain some conclusions that can be traced back to  
430 passaging artifacts. Additionally, even though passage artifacts do not appear to be  
431 sufficiently strong to affect clade-structure reconstruction (Bush et al., 2000), they do  
432 have the potential to cause artificially long branch lengths, due to  $dN/dS$  inflation, or

433 misplaced branches, due to convergent evolution under passaging. Thus, future  
434 phylogenetic predictive models of influenza fitness and antigenicity, as in (Łuksza and  
435 Lässig, 2014), (Neher et al., 2014), and (Bedford et al., 2014), should too be checked  
436 for the presence of passage-related signals. Finally, while it is beyond the scope of this  
437 work to investigate passage history effects in other viruses, we suspect that passage-  
438 derived artifacts could be a factor in their phylogenetic analyses as well. The use of data  
439 sets free of passage adaptations will likely bring computational predictions of influenza  
440 positive selection more in line with corresponding experimental results.

441  
442 Sequences without passage annotations are inadequate for reliable evolutionary  
443 analysis of influenza virus. Yet, passage annotations are often completely missing from  
444 strain information, and, when present, are often inconsistent; there is currently no  
445 standardized language to represent number and type of serial passage. We note,  
446 however, that passage annotations from the 2015 season are greatly improved when  
447 compared to previous seasons. Several major influenza repositories, including the  
448 Influenza Research Database (Squires et al., 2012) and the NCBI Influenza Virus  
449 Resource (Bao et al., 2008), do not provide any passaging annotations at all.  
450 Additionally, passage history is not required for new sequence submissions to the NCBI  
451 Genbank (Benson et al., 2012). The EpiFlu database maintained by the Global Initiative  
452 for Sharing Avian Influenza Data (GISAID) (Bogner et al., 2006) and OpenFluDB  
453 (Liechti et al., 2010), however, stand apart by providing passage history annotations for  
454 the majority of their sequences. Of these, only the OpenFluDB repository allows filtering  
455 of sequences by passage history during data download. Our results demonstrate the

456 strength of passaging artifacts in evolutionary analysis of influenza. The lack of a  
457 universal standard for annotation of viral passage histories and a universal standard for  
458 serial passage experimental conditions complicate the analysis and mitigation of  
459 passaging effects.

## 460 **METHODS**

### 461 **Influenza sequence data**

462 Non-laboratory strain H3N2 hemagglutinin (HA) sequences collected in North America  
463 were downloaded from The Global Initiative for Sharing Avian Influenza Data (GISAID)  
464 (Bogner et al., 2006) for the 1968–2015 influenza seasons. Non-complete HA  
465 sequences were excluded. Sequences were trimmed to open reading frames, filtered to  
466 remove redundancies, and aligned by translation-alignment-back-translation and  
467 MAFFT (Kato and Standley, 2013). Sequence headers of FASTA files were  
468 standardized into an uppercase text format with non-alphanumeric characters replaced  
469 by underscores. As H3N2 strains have experienced no persistent insertion or deletion  
470 events, we deleted sequences which introduced gaps to the alignment. To ascertain  
471 overall data quality, we built a phylogenetic tree of the entire sequence set (using  
472 FastTree 2.0 (Price et al., 2010)) and checked for any abnormal clades or other  
473 unexpected tree features. We found one abnormal clade of approximately 20  
474 sequences with an exceptionally long branch length ( $> 0.01$ ) and removed the  
475 sequences in that clade from further analysis. Our final data set consisted of 6873  
476 sequences from 2005-2015 as well as an outgroup of 45 sequences from 1968–1977  
477 (not considered for further analysis). We did not consider sequences collected from  
478 1978-2004.

479

## 480 **Identification of passage history and evolutionary-rate calculations**

481 We divided sequences into groups by their passage history annotation and collection  
482 year, determining passage history by parsing with regular expressions for key words in  
483 FASTA headers (Table 1). We classified 1133 sequences with indeterminate or missing  
484 passage histories, or passage through multiple categories of hosts (i.e. both egg and  
485 cell), as “other”. The final data sets for individual passage groups contained between 79  
486 and 3041 sequences (Table 1).

487

488 We next constructed phylogenetic trees for each passage group as well as one tree for  
489 a pooled data set combining all individual passage groups and other sequences. All  
490 phylogenetic trees were constructed using FastTree 2.0 (Price et al., 2010). We  
491 calculated site-specific  $dN/dS$  values using a one-rate SLAC (Single-Likelihood  
492 Ancestor Counting) model implemented in HyPhy (Pond et al., 2005). One rate models,  
493 which fit a site-specific  $dN$  and a global  $dS$ , yield more accurate estimates than two-rate  
494 models and hence are preferred (Spielman et al., 2015). Among different one-rate, site-  
495 specific models, SLAC performs nearly identical to other approaches, and it was chosen  
496 here due to its speed and ease of extracting  $dN/dS$  estimates along internal and tip  
497 branches. To obtain branch-specific estimates, we extracted the  $dN/dS$  values  
498 calculated by the SLAC algorithm at internal and tip branches.

499

500 We chose sequences from 2005-2015 as our sample set due the low number of  
501 available sequences prior to this period. As  $dN/dS$  estimates can be confounded by

502 sample size (Spielman et al., 2015), we sought to limit this effect by down-sampling  
503 each experimental set to match the number of sequences in the smallest group being  
504 considered in a particular analysis (Table 1). To reduce season-to-season variation in  
505 the comparison of unpassaged, SIAT1, and non-SIAT1 cell culture, we performed one  
506 analysis with sequences from only 2014, which is the year that maximizes sequences  
507 available from all three conditions ( $n = 249$  each).

508

### 509 **Geometric analysis of $dN/dS$ distributions**

510 For each site  $i$  in HA, we computed the correlation of  $dN/dS$  at every site  $j \neq i$  with the  
511 inverse Euclidian distance between  $j$  and  $i$  in the 3D crystal structure of the protein. This  
512 method is discussed in detail in (Meyer and Wilke, 2015). This correlation is then color-  
513 mapped onto the reference site. Sites spatially closest to positively selected regions in  
514 the protein have the highest correlation in this analysis. Thus, this approach allows us to  
515 visualize regions of increased positive selection. We processed the HA PDB structure  
516 as discussed in (Meyer and Wilke, 2015), and we provide a renumbered and formatted  
517 H3N2 structure derived from PDB ID 2YP7 (Lin et al., 2012) with our data analysis code  
518 (see below).

519

### 520 **Statistical analysis and data availability**

521 Raw influenza sequences used in this analysis are available for download from GISAID  
522 (<http://gisaid.org>) using the parameters “North America”, “H3N2”, “1976 – 2015”.  
523 Acknowledgements for sequences used in this study are available in Supplementary  
524 File 1. The complete, processed data set used in our statistical analysis is available in

525 Supplementary Dataset 6, including protein and gene numbering, computed  
526 evolutionary rates, relative solvent accessibility for the hemagglutinin trimer, and  
527 sitewise distance to protein site 224. Relative solvent accessibility of the hemagglutinin  
528 trimer was taken from (Meyer and Wilke, 2015). Site-wise distances between all amino  
529 acids in the HA structure PDBID:2YP7 were recalculated as in (Meyer and Wilke, 2015).  
530 Statistical analysis was performed using R (Ihaka and Gentleman, 1996), and all graph  
531 figures drawn with the R package ggplot2 (Wickham, 2009). Throughout this work, \*  
532 denotes a significance of  $0.01 \leq P < 0.05$ , \*\* denotes a significance of  $0.01 \leq P < 0.05$ ,  
533 and \*\*\* denotes a significance of  $P < 0.001$ .

534

535 Linear models between sitewise  $dN/dS$  and RSA or inverse distance were fit using the  
536 `lm()` function in R. Correlations were calculated using the R function `cor()` and  
537 significance determined using `cor.test()`.

538

539 Our entire analysis pipeline, instructions for running analyses and raw data (except  
540 initial sequence data per the GISAID user agreement) are available at the following  
541 Github project repository:

542 [https://github.com/wikelab/influenza\\_H3N2\\_passaging](https://github.com/wikelab/influenza_H3N2_passaging).

543

544

545

546

547



548 **AUTHOR CONTRIBUTIONS**

549 Conceived and designed the experiments: CDM COW. Wrote scripts and analytic tools:  
550 CDM AGM. Performed the experiments: CDM. Analyzed the data: CDM COW. Wrote  
551 the paper: CDM COW.

552

553 **ACKNOWLEDGEMENTS**

554 We would like to thank Sebastian Maurer-Stroh for help with interpreting passaging  
555 annotations in GISAID. This work was supported in part by NIH grant no. R01  
556 GM088344, DTRA grant no. HDTRA1-12-C-0007, and NSF Cooperative agreement no.  
557 DBI-0939454 (BEACON Center). The funders had no role in study design, data  
558 collection and analysis, decision to publish, or preparation of the manuscript.

559

560

561

562

563

564

565

566

567

568

569 **REFERENCES**

- 570 Balish, A.L., Katz, J.M., Klimov, A.I., 2005. Influenza: Propagation, Quantification, and Storage,  
571 in: Current Protocols in Microbiology. John Wiley & Sons, Inc.
- 572 Bao, Y., Bolotov, P., Dernovoy, D., Kiryutin, B., Zaslavsky, L., Tatusova, T., Ostell, J., Lipman,  
573 D., 2008. The Influenza Virus Resource at the National Center for Biotechnology  
574 Information. *J. Virol.* 82, 596–601. doi:10.1128/JVI.02005-07
- 575 Bedford, T., Suchard, M.A., Lemey, P., Dudas, G., Gregory, V., Hay, A.J., McCauley, J.W.,  
576 Russell, C.A., Smith, D.J., Rambaut, A., 2014. Integrating influenza antigenic dynamics  
577 with molecular evolution. *eLife* 3, e01914. doi:10.7554/eLife.01914
- 578 Belanov, S.S., Bychkov, D., Benner, C., Ripatti, S., Ojala, T., Kankainen, M., Lee, H.K., Tang,  
579 J.W.-T., Kainov, D.E., 2015. Genome-wide analysis of evolutionary markers of human  
580 influenza A(H1N1)pdm09 and A(H3N2) viruses may guide selection of vaccine strain  
581 candidates. *Genome Biol. Evol.* evv240. doi:10.1093/gbe/evv240
- 582 Benson, D.A., Karsch-Mizrachi, I., Clark, K., Lipman, D.J., Ostell, J., Sayers, E.W., 2012.  
583 GenBank. *Nucleic Acids Res.* 40, D48–D53. doi:10.1093/nar/gkr1202
- 584 Blackburne, B.P., Hay, A.J., Goldstein, R.A., 2008. Changing Selective Pressure during  
585 Antigenic Changes in Human Influenza H3. *PLoS Pathog* 4, e1000058.  
586 doi:10.1371/journal.ppat.1000058
- 587 Bogner, P., Capua, I., Lipman, D.J., Cox, N.J., others, 2006. A global initiative on sharing avian  
588 flu data. *Nature* 442, 981–981. doi:10.1038/442981a
- 589 Bush, R.M., Fitch, W.M., Bender, C.A., Cox, N.J., 1999. Positive selection on the H3  
590 hemagglutinin gene of human influenza virus A. *Mol. Biol. Evol.* 16, 1457–1465.
- 591 Bush, R.M., Fitch, W.M., Smith, C.B., Cox, N.J., 2001. Predicting influenza evolution: the impact  
592 of terminal and egg-adapted mutations. *Int. Congr. Ser.* 1219, 147–153.  
593 doi:10.1016/S0531-5131(01)00643-4
- 594 Bush, R.M., Smith, C.B., Cox, N.J., Fitch, W.M., 2000. Effects of passage history and sampling  
595 bias on phylogenetic reconstruction of human influenza A evolution. *Proc. Natl. Acad.*  
596 *Sci.* 97, 6974–6980. doi:10.1073/pnas.97.13.6974
- 597 Chambers, B.S., Parkhouse, K., Ross, T.M., Alby, K., Hensley, S.E., 2015. Identification of  
598 Hemagglutinin Residues Responsible for H3N2 Antigenic Drift during the 2014–2015  
599 Influenza Season. *Cell Rep.* 12, 1–6. doi:10.1016/j.celrep.2015.06.005
- 600 Echave, J., Spielman, S.J., Wilke, C.O., 2016. Causes of evolutionary rate variation among  
601 protein sites. *Nat. Rev. Genet.* doi:10.1038/nrg.2015.18

- 602 Gatherer, D., 2010. Passage in egg culture is a major cause of apparent positive selection in  
603 influenza B hemagglutinin. *J. Med. Virol.* 82, 123–127. doi:10.1002/jmv.21648
- 604 Hamamoto, I., Takaku, H., Tashiro, M., Yamamoto, N., 2013. High Yield Production of Influenza  
605 Virus in Madin Darby Canine Kidney (MDCK) Cells with Stable Knockdown of IRF7.  
606 *PLoS ONE* 8, e59892. doi:10.1371/journal.pone.0059892
- 607 Ihaka, R., Gentleman, R., 1996. R: A Language for Data Analysis and Graphics. *J. Comput.*  
608 *Graph. Stat.* 5, 299–314. doi:10.2307/1390807
- 609 Ilyushina, N.A., Ikizler, M.R., Kawaoka, Y., Rudenko, L.G., Treanor, J.J., Subbarao, K., Wright,  
610 P.F., 2012. Comparative study of influenza virus replication in MDCK cells and in  
611 primary cells derived from adenoids and airway epithelium. *J. Virol.* 86, 11725–11734.  
612 doi:10.1128/JVI.01477-12
- 613 Katoh, K., Standley, D.M., 2013. MAFFT Multiple Sequence Alignment Software Version 7:  
614 Improvements in Performance and Usability. *Mol. Biol. Evol.* 30, 772–780.  
615 doi:10.1093/molbev/mst010
- 616 Katz, J.M., Wang, M., Webster, R.G., 1990. Direct sequencing of the HA gene of influenza  
617 (H3N2) virus in original clinical samples reveals sequence identity with mammalian cell-  
618 grown virus. *J. Virol.* 64, 1808–1811.
- 619 Katz, J.M., Webster, R.G., 1989. Efficacy of Inactivated Influenza A Virus (H3N2) Vaccines  
620 Grown in Mammalian Cells or Embryonated Eggs. *J. Infect. Dis.* 160, 191–198.  
621 doi:10.1093/infdis/160.2.191
- 622 Koel, B.F., Burke, D.F., Bestebroer, T.M., van der Vliet, S., Zondag, G.C.M., Vervaet, G.,  
623 Skepner, E., Lewis, N.S., Spronken, M.I.J., Russell, C.A., Eropkin, M.Y., Hurt, A.C., Barr,  
624 I.G., de Jong, J.C., Rimmelzwaan, G.F., Osterhaus, A.D.M.E., Fouchier, R.A.M., Smith,  
625 D.J., 2013. Substitutions near the receptor binding site determine major antigenic  
626 change during influenza virus evolution. *Science* 342, 976–979.  
627 doi:10.1126/science.1244730
- 628 Koelle, K., Cobey, S., Grenfell, B., Pascual, M., 2006. Epochal evolution shapes the  
629 phylodynamics of interpandemic influenza A (H3N2) in humans. *Science* 314, 1898–  
630 1903. doi:10.1126/science.1132745
- 631 Kumar, S., Henrickson, K.J., 2012. Update on Influenza Diagnostics: Lessons from the Novel  
632 H1N1 Influenza A Pandemic. *Clin. Microbiol. Rev.* 25, 344–361.  
633 doi:10.1128/CMR.05016-11

- 634 Lee, H.K., Tang, J.W.-T., Kong, D.H.-L., Koay, E.S.-C., 2013a. Simplified Large-Scale Sanger  
635 Genome Sequencing for Influenza A/H3N2 Virus. PLoS ONE 8.  
636 doi:10.1371/journal.pone.0064785
- 637 Lee, H.K., Tang, J.W.-T., Kong, D.H.-L., Loh, T.P., Chiang, D.K.-L., Lam, T.T.-Y., Koay, E.S.-C.,  
638 2013b. Comparison of Mutation Patterns in Full-Genome A/H3N2 Influenza Sequences  
639 Obtained Directly from Clinical Samples and the Same Samples after a Single MDCK  
640 Passage. PLoS ONE 8, e79252. doi:10.1371/journal.pone.0079252
- 641 Liechti, R., Gleizes, A., Kuznetsov, D., Bougueleret, L., Mercier, P.L., Bairoch, A., Xenarios, I.,  
642 2010. OpenFluDB, a database for human and animal influenza virus. Database 2010,  
643 baq004. doi:10.1093/database/baq004
- 644 Lin, Y.P., Xiong, X., Wharton, S.A., Martin, S.R., Coombs, P.J., Vachieri, S.G., Christodoulou,  
645 E., Walker, P.A., Liu, J., Skehel, J.J., Gamblin, S.J., Hay, A.J., Daniels, R.S., McCauley,  
646 J.W., 2012. Evolution of the receptor binding properties of the influenza A(H3N2)  
647 hemagglutinin. Proc. Natl. Acad. Sci. 109, 21474–21479. doi:10.1073/pnas.1218841110
- 648 Łuksza, M., Lässig, M., 2014. A predictive fitness model for influenza. Nature 507, 57–61.  
649 doi:10.1038/nature13087
- 650 Matrosovich, M., Matrosovich, T., Carr, J., Roberts, N.A., Klenk, H.-D., 2003. Overexpression of  
651 the alpha-2,6-sialyltransferase in MDCK cells increases influenza virus sensitivity to  
652 neuraminidase inhibitors. J. Virol. 77, 8418–8425.
- 653 Meyer, A.G., Wilke, C.O., 2015. Geometric Constraints Dominate the Antigenic Evolution of  
654 Influenza H3N2 Hemagglutinin. PLoS Pathog. 11. doi:10.1371/journal.ppat.1004940
- 655 Meyer, A.G., Wilke, C.O., 2013. Integrating Sequence Variation and Protein Structure to Identify  
656 Sites under Selection. Mol. Biol. Evol. 30, 36–44. doi:10.1093/molbev/mss217
- 657 Neher, R.A., Bedford, T., 2015. nextflu: real-time tracking of seasonal influenza virus evolution  
658 in humans. Bioinformatics btv381. doi:10.1093/bioinformatics/btv381
- 659 Neher, R.A., Russell, C.A., Shraiman, B.I., 2014. Predicting evolution from the shape of  
660 genealogical trees. eLife 3, e03568. doi:10.7554/eLife.03568
- 661 Nelson, M.I., Simonsen, L., Viboud, C., Miller, M.A., Taylor, J., George, K.S., Griesemer, S.B.,  
662 Ghedin, E., Sengamalay, N.A., Spiro, D.J., Volkov, I., Grenfell, B.T., Lipman, D.J.,  
663 Taubenberger, J.K., Holmes, E.C., 2006. Stochastic Processes Are Key Determinants of  
664 Short-Term Evolution in Influenza A Virus. PLoS Pathog 2, e125.  
665 doi:10.1371/journal.ppat.0020125

- 666 Oh, D.Y., Barr, I.G., Mosse, J.A., Laurie, K.L., 2008. MDCK-SIAT1 cells show improved isolation  
667 rates for recent human influenza viruses compared to conventional MDCK cells. *J. Clin.*  
668 *Microbiol.* 46, 2189–2194. doi:10.1128/JCM.00398-08
- 669 Pan, K., Deem, M.W., 2011. Quantifying selection and diversity in viruses by entropy methods,  
670 with application to the haemagglutinin of H3N2 influenza. *J. R. Soc. Interface* 8, 1644–  
671 1653. doi:10.1098/rsif.2011.0105
- 672 Pond, S.L.K., Frost, S.D.W., Muse, S.V., 2005. HyPhy: hypothesis testing using phylogenies.  
673 *Bioinformatics* 21, 676–679. doi:10.1093/bioinformatics/bti079
- 674 Price, M.N., Dehal, P.S., Arkin, A.P., 2010. FastTree 2 – Approximately Maximum-Likelihood  
675 Trees for Large Alignments. *PLoS ONE* 5, e9490. doi:10.1371/journal.pone.0009490
- 676 Robertson, J.S., Nicolson, C., Major, D., Robertson, E.W., Wood, J.M., 1993. The role of  
677 amniotic passage in the egg-adaptation of human influenza virus is revealed by  
678 haemagglutinin sequence analyses. *J. Gen. Virol.* 74 ( Pt 10), 2047–2051.  
679 doi:10.1099/0022-1317-74-10-2047
- 680 Shih, A.C.-C., Hsiao, T.-C., Ho, M.-S., Li, W.-H., 2007. Simultaneous amino acid substitutions at  
681 antigenic sites drive influenza A hemagglutinin evolution. *Proc. Natl. Acad. Sci.* 104,  
682 6283–6288. doi:10.1073/pnas.0701396104
- 683 Skowronski, D.M., Janjua, N.Z., De Serres, G., Sabaiduc, S., Eshaghi, A., Dickinson, J.A.,  
684 Fonseca, K., Winter, A.-L., Gubbay, J.B., Kraiden, M., Petric, M., Charest, H., Bastien,  
685 N., Kwindt, T.L., Mahmud, S.M., Van Caesele, P., Li, Y., 2014. Low 2012–13 Influenza  
686 Vaccine Effectiveness Associated with Mutation in the Egg-Adapted H3N2 Vaccine  
687 Strain Not Antigenic Drift in Circulating Viruses. *PLoS ONE* 9, e92153.  
688 doi:10.1371/journal.pone.0092153
- 689 Spielman, S., Wan, S., Wilke, C.O., 2015. One-rate models outperform two-rate models in site-  
690 specific dN/dS estimation. *bioRxiv* 032805. doi:10.1101/032805
- 691 Squires, R.B., Noronha, J., Hunt, V., García-Sastre, A., Macken, C., Baumgarth, N., Suarez, D.,  
692 Pickett, B.E., Zhang, Y., Larsen, C.N., Ramsey, A., Zhou, L., Zaremba, S., Kumar, S.,  
693 Deitrich, J., Klem, E., Scheuermann, R.H., 2012. Influenza Research Database: an  
694 integrated bioinformatics resource for influenza research and surveillance. *Influenza*  
695 *Other Respir. Viruses* 6, 404–416. doi:10.1111/j.1750-2659.2011.00331.x
- 696 Stöhr, K., Bucher, D., Colgate, T., Wood, J., 2012. Influenza Virus Surveillance, Vaccine Strain  
697 Selection, and Manufacture, in: Kawaoka, Y., Neumann, G. (Eds.), *Influenza Virus,*  
698 *Methods in Molecular Biology.* Humana Press, pp. 147–162.

- 699 Suzuki, Y., 2008. Positive selection operates continuously on hemagglutinin during evolution of  
700 H3N2 human influenza A virus. *Gene* 427, 111–116. doi:10.1016/j.gene.2008.09.012
- 701 Suzuki, Y., 2006. Natural selection on the influenza virus genome. *Mol. Biol. Evol.* 23, 1902–  
702 1911. doi:10.1093/molbev/msl050
- 703 The World Health Organization, 2015. Recommended composition of influenza virus vaccines  
704 for use in the 2015- 2016 northern hemisphere influenza season.
- 705 Tien, M.Z., Meyer, A.G., Sydykova, D.K., Spielman, S.J., Wilke, C.O., 2013. Maximum allowed  
706 solvent accessibilities of residues in proteins. *PLoS One* 8, e80635.  
707 doi:10.1371/journal.pone.0080635
- 708 Tusche, C., Steinbrück, L., McHardy, A.C., 2012. Detecting patches of protein sites of influenza  
709 A viruses under positive selection. *Mol. Biol. Evol.* 29, 2063–2071.  
710 doi:10.1093/molbev/mss095
- 711 WHO Writing Group, Ampofo, W.K., Baylor, N., Cobey, S., Cox, N.J., Daves, S., Edwards, S.,  
712 Ferguson, N., Grohmann, G., Hay, A., Katz, J., Kullabutr, K., Lambert, L., Levandowski,  
713 R., Mishra, A.C., Monto, A., Siqueira, M., Tashiro, M., Waddell, A.L., Wairagkar, N.,  
714 Wood, J., Zambon, M., Zhang, W., 2012. Improving influenza vaccine virus  
715 selection Report of a WHO informal consultation held at WHO headquarters, Geneva,  
716 Switzerland, 14–16 June 2010. *Influenza Other Respir. Viruses* 6, 142–152.  
717 doi:10.1111/j.1750-2659.2011.00277.x
- 718 Wickham, H., 2009. *ggplot2: elegant graphics for data analysis*. Springer New York.
- 719 Wolf, Y.I., Viboud, C., Holmes, E.C., Koonin, E.V., Lipman, D.J., 2006. Long intervals of stasis  
720 punctuated by bursts of positive selection in the seasonal evolution of influenza A virus.  
721 *Biol. Direct* 1, 34. doi:10.1186/1745-6150-1-34
- 722 World Health Organization Global influenza surveillance network, 2011. Manual for the  
723 laboratory diagnosis and virological surveillance of influenza. Geneva, Switzerland.
- 724 Wyde, P.R., Couch, R.B., Mackler, B.F., Cate, T.R., Levy, B.M., 1977. Effects of Low- and High-  
725 Passage Influenza Virus Infection in Normal and Nude Mice. *Infect. Immun.* 15, 221–  
726 229.
- 727 Xie, H., Wan, X.-F., Ye, Z., Plant, E.P., Zhao, Y., Xu, Y., Li, X., Finch, C., Zhao, N., Kawano, T.,  
728 Zoueva, O., Chiang, M.-J., Jing, X., Lin, Z., Zhang, A., Zhu, Y., 2015. H3N2 Mismatch of  
729 2014–15 Northern Hemisphere Influenza Vaccines and Head-to-head Comparison  
730 between Human and Ferret Antisera derived Antigenic Maps. *Sci. Rep.* 5.  
731 doi:10.1038/srep15279
- 732

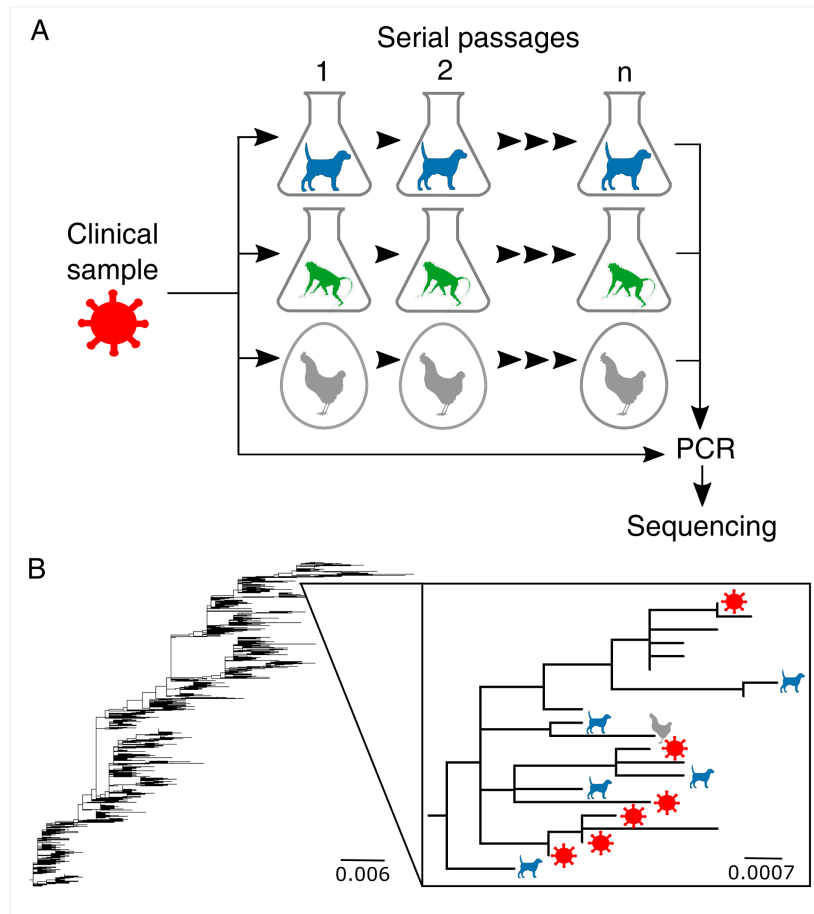

733

734 **Figure 1. Schematic of influenza A virus sequence collection and analysis. (A)**

735 Typical processing steps of influenza A virus clinical isolates. Virus collected from

736 patients may be passaged serially prior to PCR amplification and sequencing in a

737 variety of different environments (Ex. canine cell culture, monkey cell culture, egg

738 amniotes). However, some clinical virus is not passaged and is sequenced directly. (B)

739 Phylogenetic tree of H3N2 HA sequences from the 2005-2015 seasons. The inset

740 shows a small clade of sequences from the 2006/2007 season, with colored dots

741 representing sequences with passage annotations (red virion: unpassaged, blue dog:

742 canine cell culture, gray hen: egg amniote, unlabeled: missing passage history

743 annotation).

744

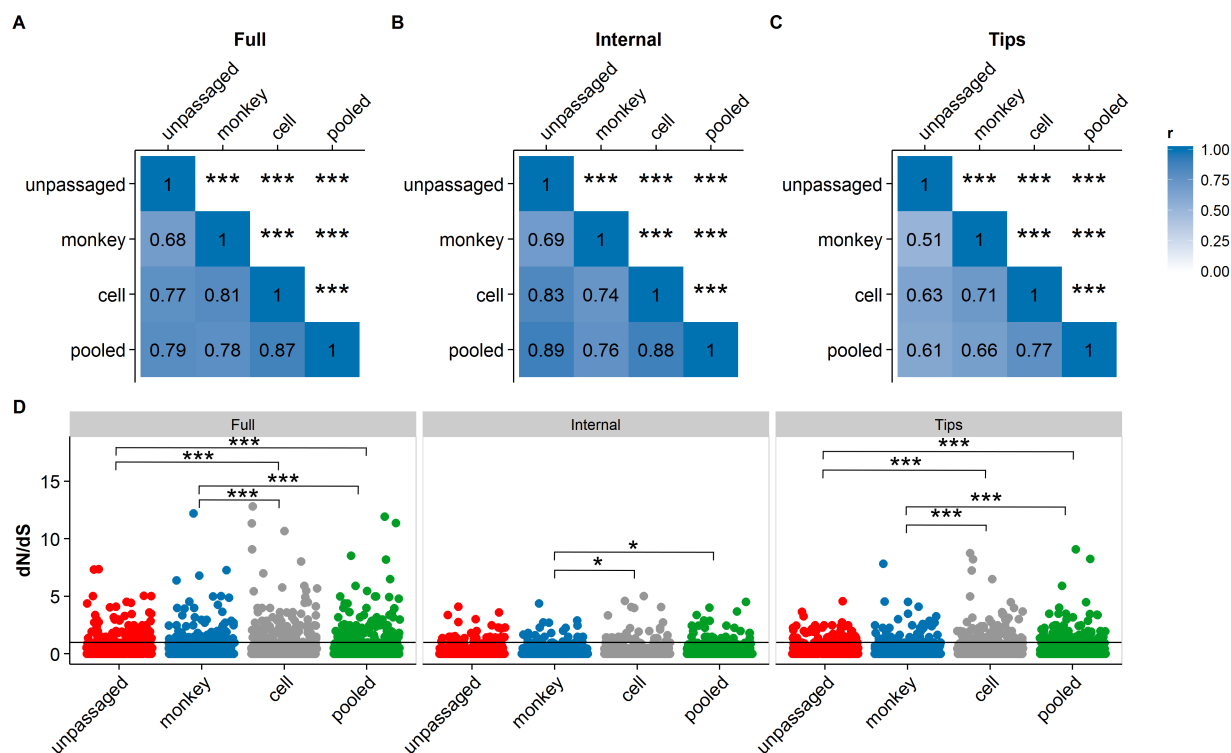

745  
 746 **Figure 2. Comparison of sitewise  $dN/dS$  values among sequences with differing**  
 747 **passage histories.** (A–C) Pearson correlations between sitewise  $dN/dS$  values for HA  
 748 sequences derived from passaged and unpassaged influenza virus collected between  
 749 2005 and 2015 (downsampled to  $n = 917$  in all groups). Correlations were calculated  
 750 separately for  $dN/dS$  estimated from complete trees (A), internal branches only (B), and  
 751 tip branches only (C). Asterisks denote significance of correlations (\* $0.01 \leq P < 0.05$ ,  
 752 \*\* $0.001 \leq P < 0.01$ , \*\*\* $P < 0.001$ ). (D) Scatter plots show the raw sitewise  $dN/dS$  values  
 753 used to calculate the correlations in parts A–C. We tested for systematic differences in  
 754  $dN/dS$  values with paired  $t$  tests, and significant differences are indicated with asterisks  
 755 (\* $0.01 \leq P < 0.05$ , \*\* $0.001 \leq P < 0.01$ , \*\*\* $P < 0.001$ ). Data used to generate this figure  
 756 are available in Supplementary Dataset 1.

757



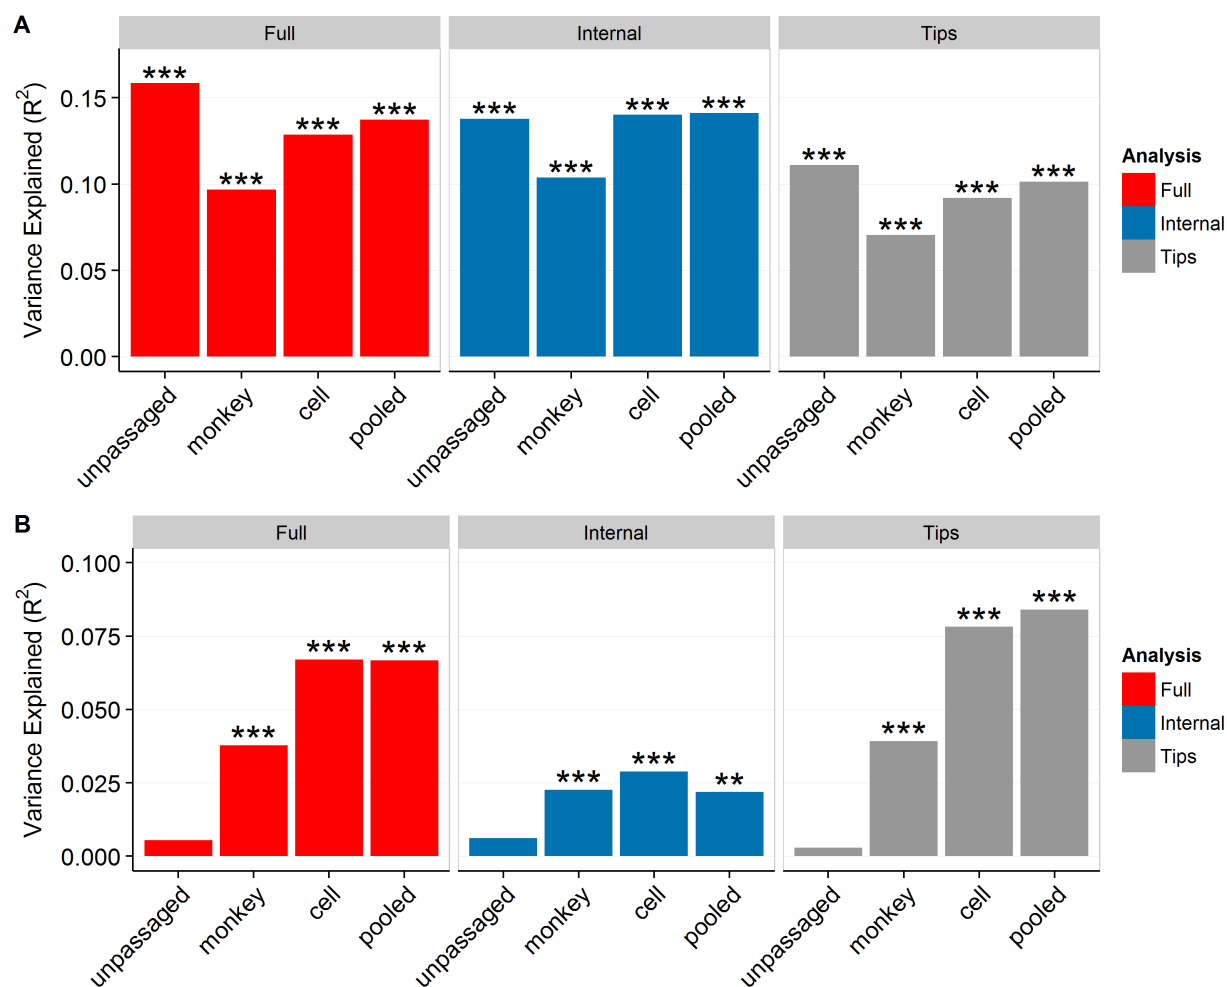

758  
 759 **Figure 3. Percent variance in  $dN/dS$  explained by relative solvent accessibility (A)**  
 760 **and by inverse distance to protein site 224 (B).** (A) Relative solvent accessibility  
 761 (RSA) explains ~10%–16% of the variation in  $dN/dS$  for all sequences. (B) Inverse  
 762 distance to site 224 explains ~7% of the variation in  $dN/dS$  for cell-passaged sequences  
 763 and for all sequences (pooled), however it explains virtually no variation for unpassaged  
 764 sequences. Asterisks denote significance of correlations ( $*0.01 \leq P < 0.05$ ,  $**0.001 \leq P$   
 765  $< 0.01$ ,  $***P < 0.001$ ). Data used to generate this figure are available in Supplementary  
 766 Dataset 1.

767

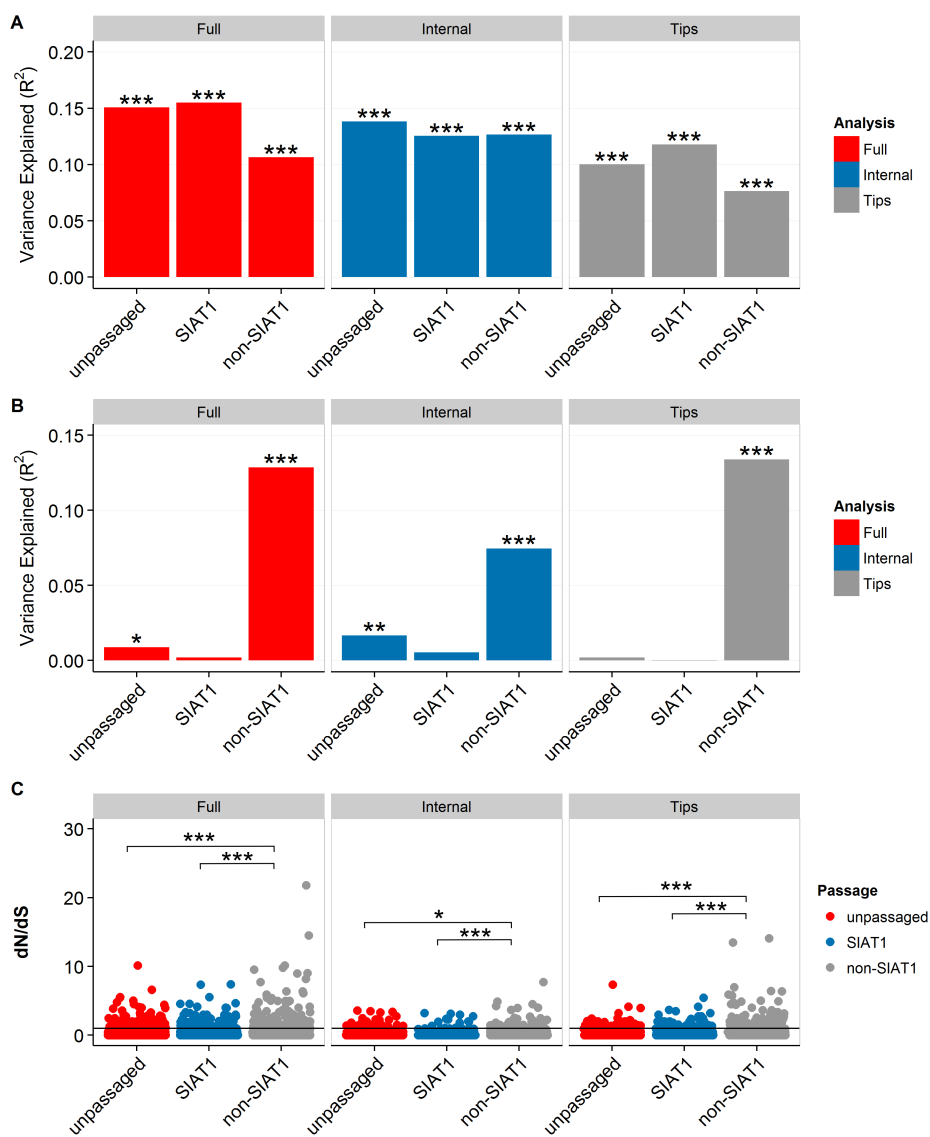

768

769 **Figure 4. Virus passaged in non-SIAT1 cells carries unique adaptations not**  
 770 **present in unpassaged or SIAT1-passaged virus.** For size matched groups of  
 771 sequences collected between 2005 and 2015 ( $n = 1046$ ), (A) the correlation between  
 772  $dN/dS$  and RSA is weakened for virus passaged in non-SIAT1 cells. (B) The correlation  
 773 between  $dN/dS$  and inverse distance to site 224, representing a positive-selection  
 774 hotspot in the vicinity of that site, is only present in virus passaged in non-SIAT1 cells.  
 775 (C) Scatter plots show individual  $dN/dS$  values obtained from the full phylogenetic tree,  
 776 internal branches only, and tip branches only. For the full tree, internal branches, and tip  
 777 branches,  $dN/dS$  in non-SIAT1-passaged virus is significantly elevated relative to  
 778 unpassaged and SIAT1-passaged virus (paired  $t$  test). Asterisks denote significance  
 779 levels ( $*0.01 \leq P < 0.05$ ,  $**0.001 \leq P < 0.01$ ,  $***P < 0.001$ ). Data used to generate this  
 780 figure are available in Supplementary Dataset 3.

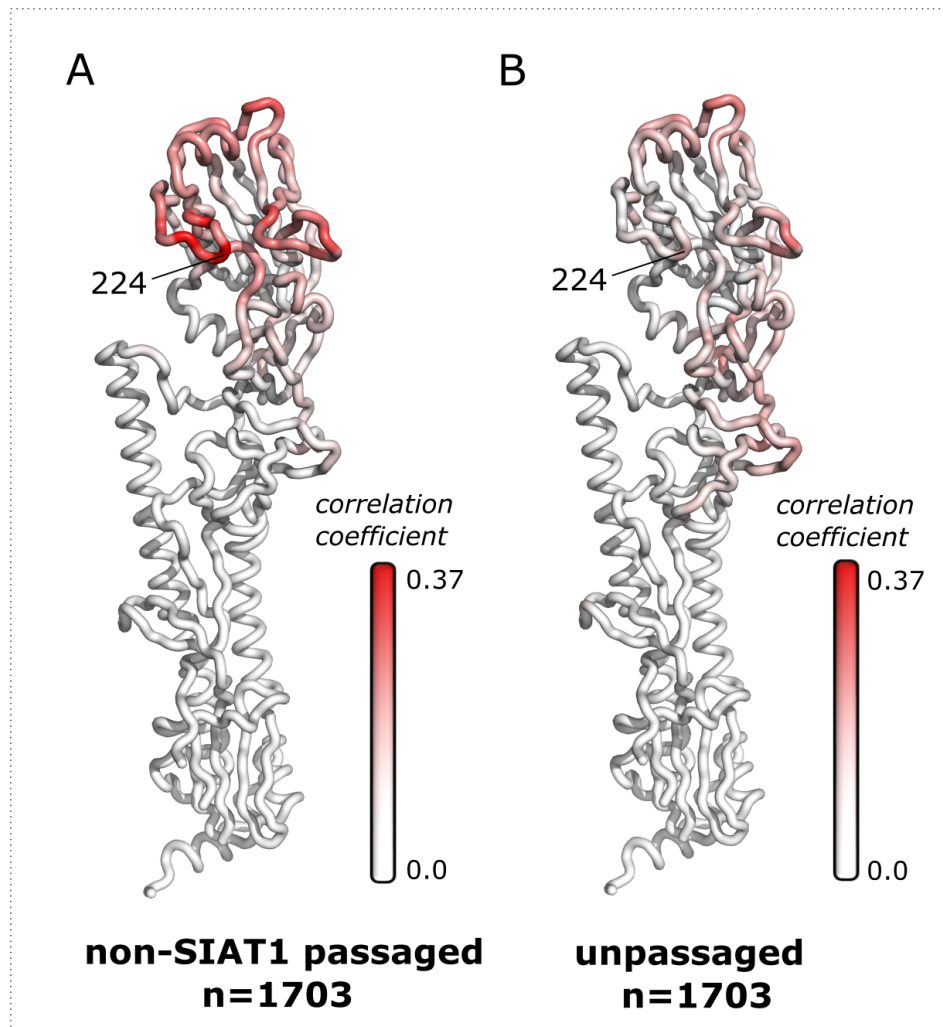

781

782 **Figure 5. Correlations mapped onto the hemagglutinin structure for non-SIAT1-**  
783 **passed and unpassed sequences.** The correlation between  $dN/dS$  and inverse  
784 distance for each reference site was mapped onto the hemagglutinin structure for (A)  
785 non-SIAT1 sequences and (B) unpassed sequences collected between 2005 and  
786 2015 ( $n = 1703$ ). Red coloring represents positive correlations, while white represents  
787 zero or negative correlations. Non-SIAT1-passaged and unpassed sequences yield  
788 distinct correlation patterns. In particular, the loop containing site 224 lights up strongly  
789 for non-SIAT1-passaged sequences but not for unpassed sequences. Data used to  
790 generate this figure are available in Supplementary Dataset 5.

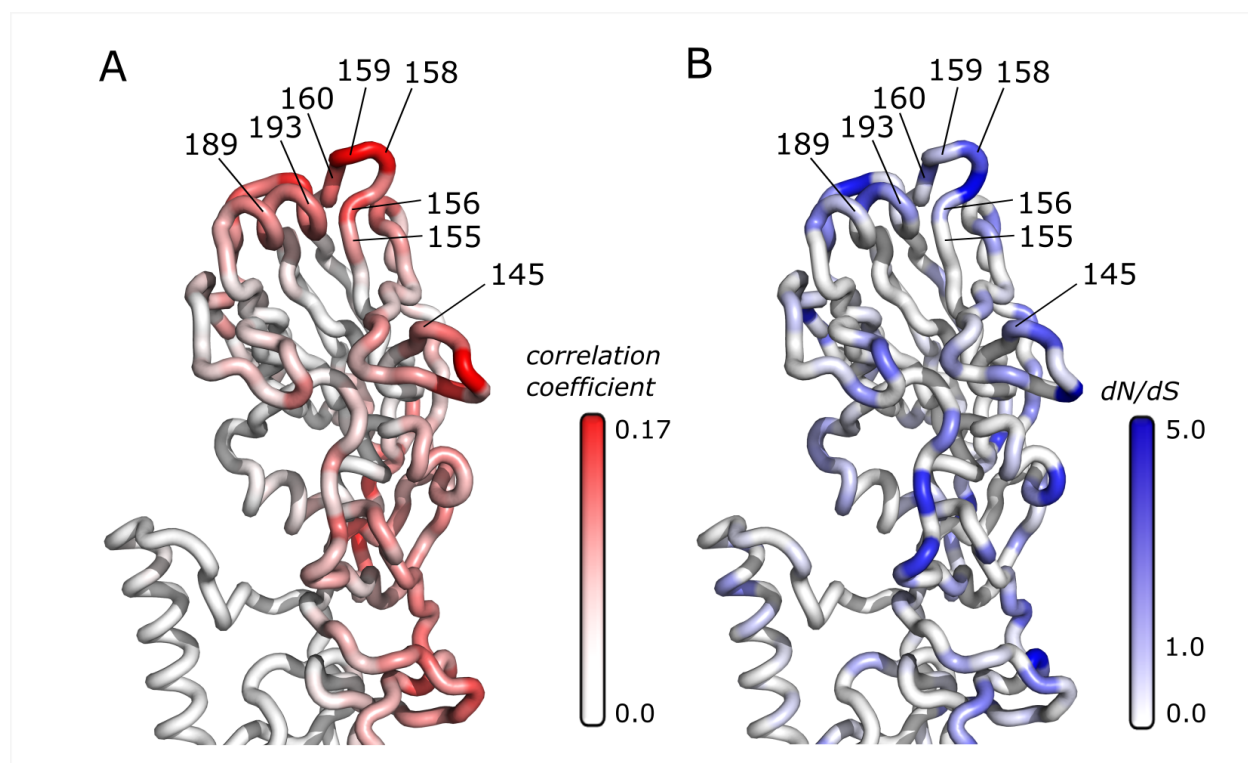

791  
792 **Figure 6. Unpassed sequences allow recovery of antigenic regions from**  
793 **positive-selection analysis.** For each site, the correlation between  $dN/dS$  and inverse  
794 distance (A) or  $dN/dS$  directly (B) were mapped onto the hemagglutinin structure, for  
795  $dN/dS$  derived from unpassed sequences collected between 2005 and 2015 ( $n =$   
796 1703). Red coloring represents higher correlation; blue coloring represents higher  
797  $dN/dS$ . Highlighted regions contain sites (labeled with protein site number) which  
798 experimentally determined to be antigenic by (Koel et al., 2013) and sites  
799 experimentally determined by (Chambers et al., 2015) to be responsible for antigenic  
800 escape of the 2014-2015 influenza. Correlations and  $dN/dS$  for antigenic sites are given  
801 in Table 2. Data used to generate this figure are available in Supplementary Dataset 5.

802

803

804

805

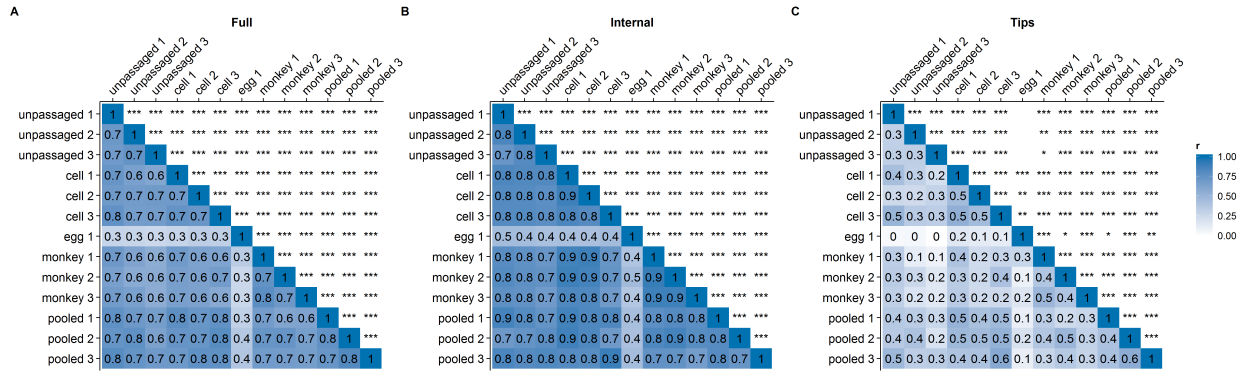

806

807 **Supplementary Figure 1. Comparison of sitewise hemagglutinin  $dN/dS$  derived**

808 **from size-matched samples of sequences with various passage histories,**

809 **including egg amniotes.** Pearson correlations between sitewise  $dN/dS$  values for HA

810 sequences derived from passaged and unpassaged influenza virus collected between

811 2005 and 2015, randomly down-sampled to 79 sequences per passage group. (Since

812 there were so few egg-derived sequences, each down-sampling was independently

813 performed three times, resulting in replicates 1, 2, and 3 for each passage group.)

814 Correlations were calculated separately for complete trees (A), internal branches only

815 (B), and tip branches only (C). Asterisks denote significance of correlations ( $*0.01 \leq P <$

816  $0.05$ ,  $**0.001 \leq P < 0.01$ ,  $***P < 0.001$ ). Data used to generate this figure are available

817 in Supplementary Dataset 2.

818

819

820

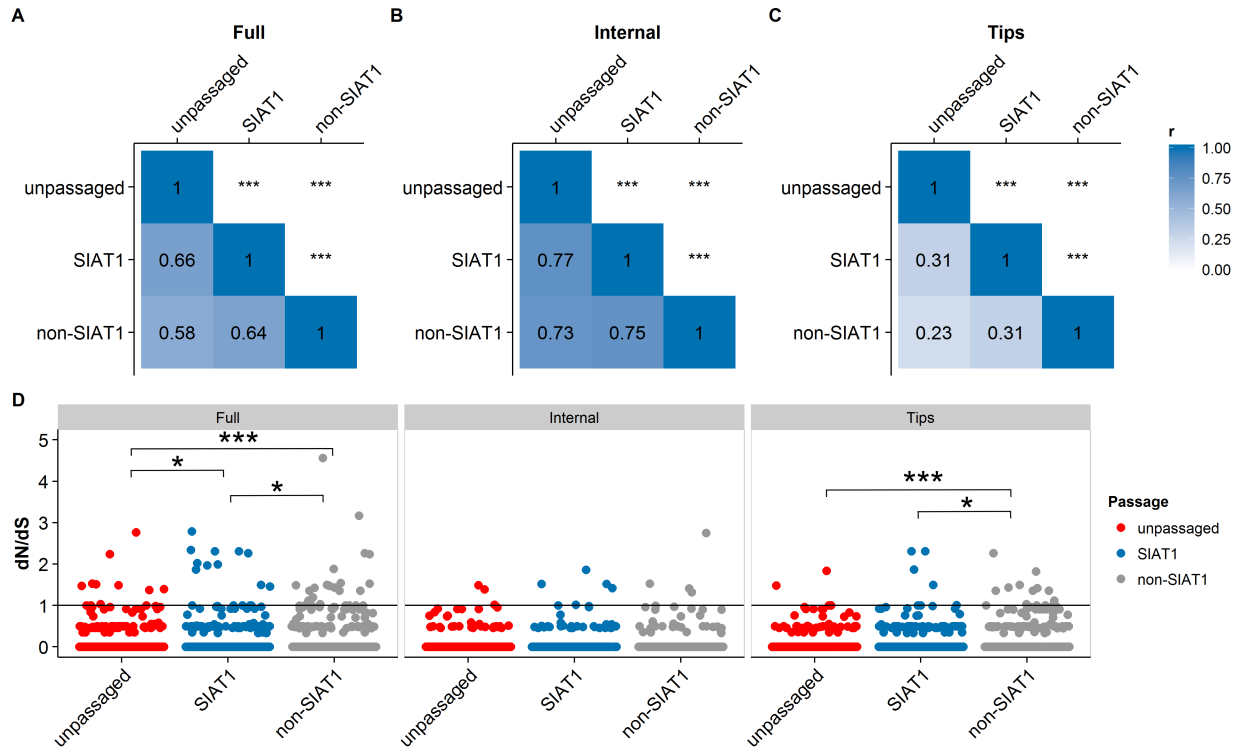

821  
 822 **Supplementary Figure 2. Comparison of unpassaged, non-SIAT1-passaged, and**  
 823 **SIAT1-passaged virus in 2014 only.** (A–C) Pearson correlations between sitewise  
 824  $dN/dS$  values for the three passage groups ( $n = 249$ ), for complete trees, internal  
 825 branches only, and tip branches only, respectively. (D) Scatter plots show the raw  
 826 sitewise  $dN/dS$  values used to calculate the correlations in parts A–C. We tested for  
 827 systematic differences in  $dN/dS$  values with paired  $t$  tests, and significant differences  
 828 are indicated with asterisks (\* $0.01 \leq P < 0.05$ , \*\* $0.001 \leq P < 0.01$ , \*\*\* $P < 0.001$ ). For the  
 829 full tree,  $dN/dS$  in both non-SIAT1-passaged virus and SIAT1-passaged virus is  
 830 significantly elevated relative to unpassaged virus. For tip branches,  $dN/dS$  in non-  
 831 SIAT1-passaged virus is significantly elevated relative to unpassaged virus. No  
 832 significant difference was found for internal branches. Data used to generate this figure  
 833 are available in Supplementary Dataset 4.

834

835 **Table 1. Parsing of passage-annotated FASTA sequences into passage history**  
 836 **groups.** For each passage group, we defined a regular expression that could reliably  
 837 identify sequences with that passage history. Regular expressions were applied through  
 838 the built-in python library “re”. SIAT1 and non-SIAT1 cell culture regular expressions  
 839 were applied to the subset of sequences identified as generic cell culture sequences.  
 840 The right three columns list the number of sequences we identified for each passage  
 841 group, for years 2005–2015, 2014 only, and 2015 only.

842

| Passage group          | Regular expression                                           | Number of sequences |      |      |
|------------------------|--------------------------------------------------------------|---------------------|------|------|
|                        |                                                              | 2005–2015           | 2014 | 2015 |
| Chicken egg amniotes   | AM[1-9] E[1-7] AMNIOTIC EGG EX AM_[1-9]                      | 79                  | 6    | 0    |
| Monkey cell culture    | TMK RMK RHMK RII PMK R[1-9] RX                               | 917                 | 366  | 290  |
| Generic cell culture   | S[1-9] SX SIAT MDCK C[1-9] CX C_[1-9] M[1-9] MX X[1-9] ^X_\$ | 3041                | 794  | 787  |
| SIAT1                  | ^S[1-9]_\$ ^SX_\$ SIAT2_SIAT1 SIAT3_SIAT1                    | 1046                | 389  | 626  |
| Non-SIAT1 cell culture | not SIAT SX S[1-9]                                           | 1755                | 297  | 56   |
| Unpassaged             | LUNG P0 OR_ ORIGINAL CLINICAL DIRECT                         | 1703                | 249  | 506  |

843  
 844  
 845  
 846  
 847  
 848  
 849

850 **Table 2. Evolutionary rates and inverse distance correlations of antigenic sites.**

851 For each site, we determined  $dN/dS$  and the correlation between  $dN/dS$  and inverse  
852 distance for unpassaged sequences collected between 2005 and 2015 ( $n = 1703$ ). 7/8  
853 antigenic sites have inverse-distance correlations above the 90<sup>th</sup> percentile, while only  
854 2/8 antigenic sites have  $dN/dS$  values above the 90<sup>th</sup> percentile. Antigenic sites were  
855 experimentally determined by (Chambers et al., 2015) and (Koel et al., 2013).

856

| Antigenic site |         |                   | Raw $dN/dS$ |            | Inv.-dist. correlation |            |
|----------------|---------|-------------------|-------------|------------|------------------------|------------|
| Gene           | Protein | Study             | $dN/dS$     | percentile | $r$                    | percentile |
| 161            | 145     | Koel              | 1.828       | 0.863      | 0.071                  | 0.910      |
| 171            | 155     | Koel              | 0           | 0.002      | 0.061                  | 0.871      |
| 172            | 156     | Koel              | 1.371       | 0.805      | 0.116                  | 0.982      |
| 174            | 158     | Koel              | 3.244       | 0.965      | 0.157                  | 0.994      |
| 175            | 159     | Koel,<br>Chambers | 0.936       | 0.738      | 0.165                  | 0.998      |
| 176            | 160     | Chambers          | 2.922       | 0.953      | 0.133                  | 0.980      |
| 205            | 189     | Koel              | 0.965       | 0.748      | 0.076                  | 0.928      |
| 209            | 193     | Koel              | 1.829       | 0.879      | 0.084                  | 0.947      |

857

858

859

860

861

862

863

864

865



866 **Supplementary File 1.** GISAID acknowledgements for hemagglutinin sequences

867 collected between 1968 and 2015.

868

869 **Supplementary Dataset 1.** Data used to generate Figures 2 and 3. This file includes 1)

870 sitewise  $dN/dS$  values of random draws of 917 unpassaged, generic cell cultured,

871 monkey cell cultured, and the pooled group sequences collected between 2005 and

872 2015, 2) protein and gene numbering, 3) PDB:2YP7 sequence, 4) relative solvent

873 accessibilities of the hemagglutinin trimer, and 5) linear distances to protein site 224.

874

875 **Supplementary Dataset 2.** Data used to generate Supplementary Figure 1. This file

876 includes 1) sitewise  $dN/dS$  values of random draws of 97 unpassaged, generic cell

877 cultured, egg cultured, monkey cell cultured, and the pooled group sequences collected

878 between 2005 and 2015, 2) protein and gene numbering, 3) PDB:2YP7 sequence.

879

880 **Supplementary Dataset 3.** Data used to generate Figure 4. This file includes 1)

881 sitewise  $dN/dS$  values of random draws of 1046 unpassaged, SIAT1, and non-SIAT1

882 cell culture sequences collected between 2005 and 2015, 2) protein and gene

883 numbering, 3) PDB:2YP7 sequence, 4) relative solvent accessibilities of the

884 hemagglutinin trimer, and 5) linear distances to protein site 224.

885

886 **Supplementary Dataset 4.** Data used to generate Supplementary Figure 2. This file

887 includes 1) sitewise  $dN/dS$  values of random draws of 249 unpassaged, SIAT1 cultured,

888 and non-SIAT1 cell cultured sequences collected in 2014, 2) protein and gene  
889 numbering, 3) PDB:2YP7 sequence.

890

891 **Supplementary Dataset 5.** Data used to generate Figures 5 and 6. This file includes 1)  
892 sitewise  $dN/dS$  values of random draws of 1703 unpassaged and non-SIAT1 cell  
893 cultured sequences collected between 2005 and 2015, 2) protein and gene numbering,  
894 3) PDB:2YP7 sequence, 4) sitewise inverse distance correlations.

895

896 **Supplementary Dataset 6.** This file includes 1) all sitewise  $dN/dS$  values used to  
897 generate figures, 2) protein and gene numbering, 3) PDB:2YP7 sequence, 4) relative  
898 solvent accessibilities of the hemagglutinin trimer, and 5) linear distances to protein site  
899 224.

900
